# Supplementary material for: Rockwall erosion rate inferred from in situ 10 Be concentration of supraglacial clasts: a review
Source: Copernicus journal article supplement (doi:10.5194/gh-80-339-2025), 2025-10-27
Supplement: Supplementary file 1 [file GH_Courtial-Manent_Suppl_Table_S1_.xlsx]

## Sheet: Sheet1
		Study	Glacier	Sample	Latitude	Longitude	Elevation	Quartz mass	10Be concentration	Uncertainty	Production rate	Calculated erosion rate by the authors	Uncertainty
					°N	°E	m a.s.l.	g	104 at.g-1	104 at.g-1	at.g-1.yr-1	mm.yr-1	mm.yr-1
	1	Seong et al., 2009	Liligo	K2E-6	35.703	76.223	5091	15.3	4.42	0.27	111.5	2.08	0.21
	2		West Gasherbrum	K2E-20	35.765	76.535	4655	6.6	11.68	2.19	157.51	0.82	0.16
	3		West Gasherbrum	K2E-23	35.758	76.536	4643	15.1	4.22	0.36	160.72	2.48	0.24
	4		Godwin	K2E-24	35.821	76.513	4869	14.4	15.54	0.75	170.64	0.65	0.03
	5		Godwin	K2E-25	35.822	76.516	4877	15	6.04	0.61	170.3	1.93	0.24
	6	Ward and Anderson, 2011	Shadows	M1-left	62.4864	-152.705	1105	62.6292	1.50179	0.21428	21
	7		Shadows	M1-right	62.4864	-152.705	1105	77.1276	2.05078	0.16285	21
	8		Shadows	M5	62.4984	-152.678	987	73.7139	1.73559	0.15045	21
	9		Shadows	M8-left	62.5104	-152.635	742	69.447	1.61697	0.2292	21
	10		Shadows	M8-right	62.5104	-152.635	742	76.4253	2.93546	0.36008	21
	11		Shadows	Shadowsmean	-	-	-	-	1.96812	0.52656	21	0.57	0.12
	12		Trident	T1	62.4584	-152.55	817	57.4	0.80253	0.09516	20	1.32	0.14
	13		Trident	T2-mean	-	-	-	-	0.79482	0.20855	20	1.33	0.28
	14		Trident	T2A(subsample)	62.4584	-152.55	817	83.6025	0.56343	0.06601	20
	15		Trident	T2B(subsample)	62.4584	-152.55	817	57.0077	0.71339	0.09553	20
	16		Trident	T2C(subsample)	62.4584	-152.55	817	71.4706	0.54104	0.07111	20
	17		Trident	T2D(subsample)	62.4584	-152.55	817	69.323	0.78024	0.07467	20
	18		Trident	T2E(subsample)	62.4584	-152.55	817	63.4127	1.37598	0.13921	20
	19		Caldwell	C1	62.3856	-152.706	942	83.3	2.27132	0.14462	20	0.67	0.04
	20		Caldwell	C2	62.3856	-152.706	942	83.52	1.5802	0.09259	20	0.47	0.03
	21	Orr et al., 2019	Kirti	Gsup1	30.9	79.09	4315	18.7	1.1	0.2	93.1	5.3	1.2
	22		Kirti	Gsup2	30.9	79.08	4280	18.7	1.6	0.3	93.1	3.6	0.8
	23		Gangotri	Gsup3	30.89	79.09	4325	18.6	2.7	0.3	95.4	2.1	0.4
	24		Gangotri	Gsup4	30.9	79.09	4285	14.6	2.5	0.3	95.4	2.3	0.4
	25		Gangotri	Gsup5	30.92	79.08	4130	16.4	2.6	0.3	95.4	2.2	0.4
	26		Gangotri	Gsup6	30.92	79.08	4130	19.9	1.5	0.4	95.4	3.8	1.1
	27	Sarr et al., 2019	Bossons	GL-1	45.8891	6.85819	1817	15.763	23.82	1.68	45.33	0.11	0.01
	28		Bossons	GL-3	45.8891	6.85819	1817	30.8567	15.17	1.07	45.33	0.17	0.02
	29		Bossons	GL-4	45.8891	6.85819	1817	12.8635	9.5	0.68	45.33	0.27	0.03
	30		Bossons	GL-5	45.8894	6.85579	1765	26.43	14.45	0.87	45.33	0.17	0.02
	31		Bossons	GL-6	45.8887	6.85539	1810	12.5531	14.1	0.76	45.33	0.18	0.02
	32		Bossons	GL-7	45.8896	6.85681	1794	14.1871	19.39	2.54	45.33	0.13	0.02
	33		Bossons	Bos_Supra	45.8883	6.85465	1795		2.72	0.24	45.33	0.93	0.12
	34		Bossons	GL-18	45.8795	6.86812	2561	15.294	3.79	0.62	45.33	0.52	0.1
	35		Bossons	GL-19	45.8795	6.86812	2561	14.2709	3.03	0.45	35.25	0.64	0.11
	36		Bossons	GL-20	45.8795	6.86812	2561	10.8867	4.26	0.65	35.25	0.46	0.08
	37		Bossons	GL-21	45.8803	6.87027	2570	13.7564	1.97	0.24	35.25	1.08	0.12
	38		Argentière	GL-15	45.9646	6.96944	2346	11.6906	9.78	0.62	36.11	0.2	0.02
	39		Argentière	GL-16	45.9646	6.96944	2346	14.7842	10.38	0.73	36.11	0.19	0.02
	40		Argentière	GL-17	45.9646	6.96944	2346	9.9134	12.51	1.3	36.11	0.16	0.02
	41	Courtial-Manent et al., 2025	Argentière	ARG17_01*	45.9653	6.97439	2357	8.17	3.26	0.35	36.09	0.62	0.09
	42		Argentière	ARG17_02*	45.9644	6.97369	2366	6.67	5.21	0.46	37.39	0.4	0.052
	43		Argentière	ARG17_03*	45.9635	6.97227	2403	21.98	7.27	0.8	36.17	0.28	0.023
	44		Bossons	B21-1 GC*	45.8891	6.85785	1741	29	5.88613	0.304685	45.3
	45		Bossons	B21-1G*	45.8891	6.85785	1741	34.7376	9.13	0.913	45.3
	46		Bossons	B21-2*	45.8895	6.85756	1732	27.965	4.52	0.334	45.3
	47		Brenva (up)	BRNV22*	45.8295	6.90639	3910	41.1	1.13426	0.15528	-
	48		Brenva rockfall	BRNV23-1*	45.8144	6.94044	1455	35.9784	0.27	0.15	-
	49		Brenva rockfall	BRNV23-2*	45.8139	6.94071	1469	25.8167	0.44	0.19	-
	50	Matmon et al., 2020	Kahiltna	14PH017	62.82	-151.257	1390	8.909	4.752	0.503	-	0.187	0.03003
	51		Kahiltna	14PH018	62.824	-151.26	1394	12.49	2.455	0.273	-	0.363	0.0602
	52		Kahiltna	14PH019	62.821	-151.255	1392	9.313	1.696	0.382	-	0.524	0.1345
	53		Kahiltna	14PH020	62.812	-151.249	1369	12.812	2.84	1.079	-	0.308	0.1231
	54		Kahiltna	14PH021	62.812	-151.247	1377	23.632	1.644	0.122	-	0.537	0.077
	55		Kahiltna	14PH023	62.608	-151.282	551	11.013	2.629	0.362	-	0.167	0.0309
	56		Kahiltna	14PH024	62.608	-151.281	559	11.267	3.208	0.247	-	0.137	0.02
	57	Scherler and Egholm, 2020	Chhota Shigri	CSM1	32.2285	77.5113	4773.04	26.39	2.7093	0.1664	72.5591	1.3	0.15
	58		Chhota Shigri	CSM2	32.2325	77.5123	4755.73	26.78	3.791	0.2058	72.5591	0.93	0.1
	59		Chhota Shigri	CSM3	32.2366	77.5142	4718.72	28.75	5.3607	0.2488	72.5591	0.66	0.06
	60		Chhota Shigri	CSM4	32.2409	77.5158	4688.44	30.2	6.1631	0.2649	72.5591	0.57	0.05
	61		Chhota Shigri	CSM5	32.2449	77.5182	4638.21	25.39	3.6368	0.2022	72.5591	0.97	0.1
	62	Orr et al., 2021	Gopal	GGop1	33.9865	77.457	5294	23.3326	20.9	0.7	105.3	0.3	0.04
	63		Stok	GStk1	33.9668	77.4684	5339	6.4552	6	0.7	108.5	1.1	0.2
	64		Amda	GAmd1	33.6833	77.591	5340	25.8515	10.8	0.3	107.1	0.5	0.1
	65		Amda	GAmd2	33.6837	77.5909	5410	30.8093	9.5	0.3	107.1	0.7	0.1
	66		Karzok	GKar1	32.9668	78.1775	5362	22.6878	213	3.5	105.9	0.03	0.004
	67		Karzok	GKar2	32.9665	78.1776	5367	13.2533	214	3.2	105.9	0.03	0.004
	68		Karzok	GKar3	32.9663	78.1776	5371	27.3612	260	12.5	105.9	0.02	0.004
	69		Mentok	GMen1	32.9332	78.2107	5506	29.3919	32.9	1.2	107.5	0.2	0.03
	70		Urgos	GUrg1	32.899	76.7646	4420	17.6703	1.7	0.2	90.2	3	0.5
	71		Urgos	GUrg2	32.8999	76.7635	4434	20.0819	0.7	0.02	90.2	7.5	1
	72		Panchi	GPan1	32.7244	77.302	4349	0.3987	19.3	4.5	77.9	0.2	0.1
	73		Shitidhar	GSht1	32.4159	77.1049	3568	4.66	3.2	0.4	60.2	1.1	0.2
	74		Batal	GBat1	32.3628	77.6012	4310	11.3517	30.6	1	81	0.2	0.02
	75		Batal	GBat2	32.3609	77.5981	4368	6.3124	3.5	0.3	81	1.3	0.2
	76		ChhotaShigri	GCht1	32.2639	77.5283	4273	27.0872	3.2	0.3	82.6	1.5	0.3
	77		ChhotaShigri	GCht2	32.2635	77.5283	4281	26.4	3.9	0.3	82.6	1.3	0.2
	78		ChhotaShigri	GCht3	32.2629	77.5285	4292	27.444	4.2	1.3	82.6	1.1	0.4
	79		ChhotaShigri	GCht4	32.2621	77.5287	4316	18.7804	1.1	0.004	82.6	4.2	0.6
	80		ChhotaShigri	GCht5	32.2611	77.5282	4336	29.3671	1	0.05	82.6	4.8	0.7
	81		Hamtah	GHam1	32.2643	77.3583	4085	27.9648	1.3	0.01	72	3.2	0.4
	82		Hamtah	GHam2	32.264	77.3579	4083	26.2989	2	0.2	72	2	0.4
	83		Hamtah	GHam3	32.2635	77.3585	4091	25.0875	1.2	0.2	72	3.5	0.7
	84		Hamtah	GHam4	32.2626	77.3582	4095	29.8146	0.8	0.1	72	5.2	1.1
	85		BeasKund	GBea1	32.3543	77.0858	3604	26.9295	0.6	0.05	52.6	5.4	0.9
	86		BeasKund	GBea2	32.3536	77.0863	3594	25.8173	0.8	0.1	52.6	3.8	0.7
	87		BeasKund	GBea3	32.3534	77.0864	3579	24.7578	0.5	0.04	52.6	6.5	1
	88	Wetterauer et al., 2022	Otemma	UM1/f	45.9653	7.46569	2918	26.7761	0.552781	0.0567501	39.44	5.10146	0.812947
	89		Otemma	UM2/f	45.9617	7.46218	2882	-	0.740606	0.0790601	39.44	4.20854	0.745404
	90		Otemma	UM3/f	45.9584	7.45594	2837	26.8801	0.652219	0.0574782	39.44	5.76518	1.01782
	91		Otemma	UM4/f	45.9543	7.45037	2789	22.8226	3.83173	0.186348	39.44	0.592446	0.0577164
	92		Otemma	UM5/f	45.9507	7.4458	2747	23.062	1.09576	0.0782513	39.44	2.46448	0.302222
	93		Otemma	UM6/f	45.9483	7.44045	2707	22.9737	1.55164	0.0984737	39.44	1.60897	0.178839
	94		Otemma	UM7/f	45.9455	7.43515	2663	23.3925	2.63444	0.173879	39.44	0.884406	0.0970258
	95		Otemma	UM8/f	45.943	7.42972	2600	22.3921	2.0316	0.123388	39.44	1.18594	0.127377
	96		Otemma	UM9/f	45.9407	7.42479	2547	22.6727	1.85904	0.113607	39.44	1.31568	0.142566
	97		Otemma	UM1/c	45.9653	7.46569	2918	32.2511	0.369	0.047	39.44	9.14074	2.00661
	98		Otemma	UM3/c	45.9584	7.45594	2837	32.6934	0.301	0.038	39.44	n.a.	n.a.
	99		Otemma	UM4/c	45.9543	7.45037	2789	37.0912	0.448	0.044	39.44	10.8471	2.6048
	100		Otemma	UM5/c	45.9507	7.4458	2747	25.0663	0.747	0.076	39.44	4.14399	0.703546
	101		Otemma	UM7/c	45.9455	7.43515	2663	32.4323	1.306	0.089	39.44	1.98214	0.231568
	102		Otemma	UM9/c	45.9407	7.42479	2547	32.6918	1.703	0.1	39.44	1.45645	0.155841
	103		Otemma	UM2/0.8	45.9617	7.46218	2882	21.2934	0.934	0.118	39.44	3.03989	0.57139
	104		Otemma	UM2/2	45.9617	7.46218	2882	23.4749	0.83	0.082	39.44	3.57668	0.573089
	105		Otemma	UM2/4	45.9617	7.46218	2882	32.0652	0.547	0.051	39.44	6.83882	1.26575
	106		Otemma	UM2/8	45.9617	7.46218	2882	32.1221	0.97	0.069	39.44	2.89172	0.359964
	107		Otemma	UM2/16	45.9617	7.46218	2882	32.7789	0.18	0.034	39.44	n.a.	n.a.
	108		Otemma	LM1/f	45.9613	7.46208	2875	-	1.7781	0.114256	40.43	1.31992	0.141171
	109		Otemma	LM2/f	45.9582	7.45599	2835	22.6377	2.23731	0.139034	40.43	1.08623	0.116251
	110		Otemma	LM3/f	45.9542	7.4507	2791	14.5405	1.30938	0.132094	40.43	2.15494	0.32954
	111		Otemma	LM4/f	45.9504	7.44592	2749	20.311	1.26614	0.110262	40.43	2.3922	0.346963
	112		Otemma	LM5/f	45.948	7.44072	2712	22.8969	1.46813	0.0992548	40.43	1.96778	0.237726
	113		Otemma	LM6/f	45.945	7.43536	2668	17.1141	3.08115	0.199985	40.43	0.801488	0.0879755
	114		Otemma	LM1/0.8	45.9613	7.46208	2875	26.9836	1.527	0.126	40.43	1.55251	0.187869
	115		Otemma	LM1/2	45.9613	7.46208	2875	22.5779	1.628	0.106	40.43	1.45025	0.156536
	116		Otemma	LM1/4	45.9613	7.46208	2875	31.8725	2.097	0.11	40.43	1.1087	0.109835
	117		Otemma	LM1/8	45.9613	7.46208	2875	32.0838	1.822	0.108	40.43	1.28605	0.133204
	118		Otemma	LM1/16	45.9613	7.46208	2875	21.5062	1.323	0.114	40.43	1.81362	0.226115
	119	Wetterauer et al., 2023	Brenay	B1	45.9672	7.41813	2880	40.9523	2.35779	0.121172	43.3888	0.978542	0.0949671
	120		Brenay	B2	45.9648	7.41439	2843	34.5137	3.29699	0.155798	43.3888	0.699712	0.0664254
	121		Brenay	B3	45.9627	7.41102	2819	33.3634	3.30522	0.159755	43.3888	0.69797	0.0666386
	122		Brenay	B4	45.9608	7.40737	2755	37.8217	3.03891	0.146907	43.3888	0.759159	0.0724815
	123		Brenay	B5	45.9596	7.40317	2698	42.5272	3.33278	0.149713	43.3888	0.692195	0.0649226
	124		Cheillon	C1	46.0023	7.42669	2882	35.5527	0.456042	0.0428938	34.902	3.94915	0.493581
	125		Cheillon	C2	46.0046	7.42468	2852	38.9303	0.330273	0.0364212	34.902	5.45309	0.750369
	126		Cheillon	C3	46.0073	7.42457	2839	35.2928	0.568963	0.0524099	34.902	3.16531	0.391015
	127		Cheillon	C4	46.0099	7.42545	2799	37.4659	0.436228	0.0474461	34.902	4.12853	0.563122
	128		Cheillon	C5	46.0125	7.42639	2771	33.1502	0.274832	0.0428655	34.902	6.55317	1.15569
	129		Cheillon	C6	46.0152	7.42705	2739	33.6435	0.437596	0.0476117	34.902	4.11562	0.561487
	130		Pièce	P1	45.9967	7.47032	2859	40.4466	0.439984	0.045871	37.3868	4.47306	0.594155
	131		Pièce	P2	45.9983	7.4692	2802	32.1912	0.434592	0.0532685	37.3868	4.52855	0.66861
	132		Pièce	P3	46.0001	7.46895	2775	31.8693	0.383234	0.0493129	37.3868	5.13547	0.784436
	133		Tsijiore Nouve	TN1	46.0067	7.45538	2530	39.9071	0.224505	0.0367139	38.5788	8.83456	1.61741
	134		Tsijiore Nouve	TN2	46.0075	7.45558	2526	40.8385	0.205247	0.0328658	38.5788	9.66349	1.73983
	135		Tsijiore Nouve	TN3	46.0084	7.45583	2509	39.6965	0.168275	0.0314075	38.5788	11.7867	2.40432
	136		Tsijiore Nouve	TN4	46.0096	7.45612	2491	40.7821	0.205131	0.0340985	38.5788	9.66897	1.79348
	137		Tsijiore Nouve	TN5	46.0105	7.45648	2480	40.6253	0.183559	0.0312288	38.5788	10.8053	2.04212
	138		Tsijiore Nouve	TN6	46.0113	7.45675	2466	40.6411	0.370838	0.0393777	38.5788	5.34832	0.718538
	139		Tsijiore Nouve	TN7	46.0122	7.45718	2458	40.7119	0.244545	0.0392249	38.5788	8.11056	1.46221
	140		Tsijiore Nouve	TN8	46.0133	7.45777	2457	38.1968	0.340079	0.0412001	38.5788	5.83209	0.854182
	141		Tsijiore Nouve	TN9	46.014	7.4586	2433	39.7162	0.194851	0.0358228	38.5788	10.1791	2.05037
	142		Tsijiore Nouve	TN10	46.0145	7.45967	2431	40.6695	0.251079	0.0348871	38.5788	7.89948	1.27573
	143	Courtial-Manent et al., 2025	Tsijiore Nouve	ARO1*	46.0147	7.46491	2411	5.15	0.528	0.133	41.21	4.33	1.17
	144	Courtial-Manent et al., 2024b	Mer de Glace	MG17_01	45.9154	6.93371	1936	6.91	1.69	0.22
	145		Mer de Glace	MG17_02	45.9173	6.93324	1922	4.03	1.79	0.24
	146		Mer de Glace	MG18_03	45.8983	6.93702	2145	24.35	1.97	0.4
	147		Mer de Glace	MG21_01	45.9093	6.93828	1870	29.71	2	0.3
	148		Mer de Glace	MG21_02	45.9202	6.92909	1978	48.5	1.22	0.17
	149		Mer de Glace	MG23_01	45.9209	6.92725	1870	15.73	6.69	0.44
	150		Mer de Glace	MG23_02	45.9181	6.93143	1911	23.51	4.09	0.27
	151		Mer de Glace	MG23_03	45.9217	6.92466	1844	19.83	2.26	0.28
	152	Courtial-Manent et al., 2024b	Frêney	FR17-1	45.8054	6.89099	2558	16.4232	12.7	0.73
	153		Frêney	FR17-2	45.8049	6.89079	2537	31.77	92	3.16
	154		Frêney	FR17-3	45.8041	6.89041	2506	11.75	23.8	1.28
	155		Frêney	FR21-1	45.8033	6.88864	2472	34.1057	2.6	0.294
	156		Frêney	FR21-2	45.8031	6.88903	2466	48.4824	9.3	0.347
	157		Frêney	FR22-1	45.8095	6.8916	2953	43.4497	8.73	0.285
