# Supplementary material for: Rockwall erosion rate inferred from in situ 10 Be concentration of supraglacial clasts: a review
Source: Copernicus journal article supplement (doi:10.5194/gh-80-339-2025), 2025-10-27
Supplement: Supplementary file 2 [file GH_Courtial-Manent_Suppl_Table_S2.xlsx]

## Sheet: Sheet2
	Meteorological station Chamonix		Meteorological station Jungfrau		Meteorological station Zermat
	Chamonix_min	Chamonix_max	Jungfrau_min	Jungfrau_max	Zermatt_min	Zermatt_max
	°Celsius	°Celsius	°Celsius	°Celsius	°Celsius	°Celsius
January	-7.01613	2.93323	-15.566	-9.81882	-7.66183	0.737419
February	-6.28937	5.28819	-16.3753	-10.5914	-7.46635	1.50579
March	-2.75688	9.51086	-14.8071	-9.16602	-4.39075	5.30473
April	0.655222	13.1011	-12.4174	-6.80678	-1.12522	9.02733
May	4.81022	18.0682	-7.77258	-2.32366	3.08849	13.8627
June	7.54144	21.4628	-4.71822	0.867778	5.93444	17.1759
July	8.99495	23.7761	-2.40914	3.01118	7.85323	19.606
August	8.63796	23.5096	-2.11634	3.06763	7.83581	19.2919
September	5.96911	19.4	-4.69933	0.321111	4.799	15.4289
October	2.80613	15.0849	-7.23527	-2.12237	1.40344	11.4053
November	-2.00289	7.627	-12.166	-6.79889	-3.51656	4.78578
December	-5.63376	2.70312	-14.6256	-8.93613	-6.50559	1.32398
Mean (Year)	1.34827	13.5809	-9.53597	-4.06991	0.0609382	10.0006
