# Supplementary material for: Rockwall erosion rate inferred from in situ 10 Be concentration of supraglacial clasts: a review
Source: Copernicus journal article supplement (doi:10.5194/gh-80-339-2025), 2025-10-27
Supplement: Supplementary file [file gh-80-339-2025-supplement-title-page.pdf › gh-80-339-2025-supplement-title-page.pdf]

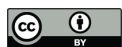

*Supplement of*

## **Rockwall erosion rate inferred from in situ $^{10}\text{Be}$ concentration of supraglacial clasts: a review**

**Léa Courtial-Manent et al.**

*Correspondence to:* Léa Courtial-Manent ([lea.courtial-manent@univ-smb.fr](mailto:lea.courtial-manent@univ-smb.fr))

- [gh-80-339-2025-supplement-title-page.pdf](#)
- [GH\\_Courtial-Manent\\_10Besupra.kmz](#)
- [GH\\_Courtial-Manent\\_Suppl\\_Table\\_S1\\_.xlsx](#)
- [GH\\_Courtial-Manent\\_Suppl\\_Table\\_S2.xlsx](#)

The copyright of individual parts of the supplement might differ from the article licence.
